# Supplementary material for: Familial Dysautonomia (FD) Human Embryonic Stem Cell Derived PNS Neurons Reveal that Synaptic Vesicular and Neuronal Transport Genes Are Directly or Indirectly Affected by IKBKAP Downregulation
Source: PLoS One. 2015 Oct 5;10(10):e0138807. doi: 10.1371/journal.pone.0138807 (PMC4593545; doi:10.1371/journal.pone.0138807)
Supplement: S2 Table — (XLSX) [file pone.0138807.s008.xlsx]

## Sheet: Stable2
	Processes and functions attributed to genes that are downregulated and upregulated in FD neurons by GO analysis
GO Term		Number of genes	Gene names
	process
	Downregulated genes
GO:0007010	cytoskeleton organization	36	ELMO1 - engulfment and cell motility 1	FGD4 - fyve	rhogef and ph domain containing 4	APC - adenomatous polyposis coli	NEFL - neurofilament	light polypeptide	FGF13 - fibroblast growth factor 13	TMSB15B - thymosin beta 15b	NUAK2 - nuak family	snf1-like kinase	2	MTM1 - myotubularin 1	SPC25 - spc25	ndc80 kinetochore complex component	homolog (s. cerevisiae)	SRGAP2 - slit-robo rho gtpase activating protein 2	FMN2 - formin 2	ARHGAP26 - rho gtpase activating protein 26	PLCE1 - phospholipase c	epsilon 1	SYNE2 - spectrin repeat containing	nuclear envelope 2	ADD2 - adducin 2 (beta)	SHROOM3 - shroom family member 3	CORO2B - coronin	actin binding protein	2b	CNTN2 - contactin 2 (axonal)	BUB1B - budding uninhibited by benzimidazoles 1 homolog beta (yeast)	FHOD3 - formin homology 2 domain containing 3	SEMA6A - sema domain	transmembrane domain (tm)	and cytoplasmic domain	(semaphorin) 6a	MARK1 - map/microtubule affinity-regulating kinase 1	MAP1B - microtubule-associated protein 1b	MAP2 - microtubule-associated protein 2	CLASP2 - cytoplasmic linker associated protein 2	BICD1 - bicaudal d homolog 1 (drosophila)	CAP2 - cap	adenylate cyclase-associated protein	2 (yeast)	CXADR - coxsackie virus and adenovirus receptor	SPIRE1 - spire homolog 1 (drosophila)	PCLO - piccolo (presynaptic cytomatrix protein)	KIT - v-kit hardy-zuckerman 4 feline sarcoma viral oncogene homolog	SIPA1L1 - signal-induced proliferation-associated 1 like 1
GO:0007411	axon guidance	34	KIF5C - kinesin family member 5c	NEUROG2 - neurogenin 2	KIAA1598 - kiaa1598	FEZ1 - fasciculation and elongation protein zeta 1 (zygin i)	BMPR1B - bone morphogenetic protein receptor	type ib	NRCAM - neuronal cell adhesion molecule	ITGA2 - integrin	alpha 2 (cd49b	alpha 2 subunit of vla-2 receptor)	TRPC4 - transient receptor potential cation channel	subfamily c	member 4	DCX - doublecortin	KCNQ3 - potassium voltage-gated channel	kqt-like subfamily	member 3	SRGAP2 - slit-robo rho gtpase activating protein 2	DCC - deleted in colorectal carcinoma	PLXNA2 - plexin a2	LHX2 - lim homeobox 2	ODZ2 - odz	odd oz/ten-m homolog 2 (drosophila)	FEZF2 - fez family zinc finger 2	OTX2 - orthodenticle homeobox 2	CNTN2 - contactin 2 (axonal)	FYN - fyn oncogene related to src	fgr	yes	ETV4 - ets variant 4	SEMA6A - sema domain	transmembrane domain (tm)	and cytoplasmic domain	(semaphorin) 6a	FZD3 - frizzled family receptor 3	EPHB1 - eph receptor b1	TBR1 - t-box	brain	1	CLASP2 - cytoplasmic linker associated protein 2	CDH4 - cadherin 4	type 1	r-cadherin (retinal)	CAP2 - cap	adenylate cyclase-associated protein	2 (yeast)	LAMA1 - laminin
GO:0007399	nervous system development	33	NRN1 - neuritin 1	PRPS1 - phosphoribosyl pyrophosphate synthetase 1	FGF14 - fibroblast growth factor 14	FAM5C - family with sequence similarity 5	member c	MPPED2 - metallophosphoesterase domain containing 2	FEZ1 - fasciculation and elongation protein zeta 1 (zygin i)	FGF13 - fibroblast growth factor 13	FGF12 - fibroblast growth factor 12	EDNRB - endothelin receptor type b	DCX - doublecortin	CHRM3 - cholinergic receptor	muscarinic 3	FABP7 - fatty acid binding protein 7	brain	EFNB2 - ephrin-b2	SEMA5B - sema domain	seven thrombospondin repeats (type 1 and type 1-like)	transmembrane domain (tm) and short cytoplasmic domain	(semaphorin) 5b	ARHGAP26 - rho gtpase activating protein 26	WNT8B - wingless-type mmtv integration site family	member 8b	NAIP - nlr family	apoptosis inhibitory protein	PDPN - podoplanin	GRIK1 - glutamate receptor	ionotropic	kainate 1	AQP4 - aquaporin 4	GPM6B - glycoprotein m6b	NR2E1 - nuclear receptor subfamily 2	group e	member 1	SEMA6A - sema domain	transmembrane domain (tm)	and cytoplasmic domain	(semaphorin) 6a	TMOD2 - tropomodulin 2 (neuronal)	NDP - norrie disease (pseudoglioma)	PTN - pleiotrophin	FUT9 - fucosyltransferase 9 (alpha (1	3) fucosyltransferase)	ST8SIA2 - st8 alpha-n-acetyl-neuraminide alpha-2	8-sialyltransferase 2	ELAVL3 - elav (embryonic lethal	abnormal vision
GO:0043547	positive regulation of GTPase activity	17	PREX1 - phosphatidylinositol-3	4	5-trisphosphate-dependent rac exchange factor 1	RALGAPA2 - ral gtpase activating protein	alpha subunit 2 (catalytic)	GNAO1 - guanine nucleotide binding protein (g protein)	alpha activating activity polypeptide o	PLCB1 - phospholipase c	beta 1 (phosphoinositide-specific)	ARHGEF6 - rac/cdc42 guanine nucleotide exchange factor (gef) 6	RGS20 - regulator of g-protein signaling 20	PREX2 - phosphatidylinositol-3	4	5-trisphosphate-dependent rac exchange factor 2	RGS6 - regulator of g-protein signaling 6	CHN2 - chimerin (chimaerin) 2	SRGAP2 - slit-robo rho gtpase activating protein 2	OCRL - oculocerebrorenal syndrome of lowe	NTRK3 - neurotrophic tyrosine kinase	receptor	type 3	SIPA1L1 - signal-induced proliferation-associated 1 like 1	RGS7 - regulator of g-protein signaling 7	ARHGAP26 - rho gtpase activating protein 26	RP2 - retinitis pigmentosa 2 (x-linked recessive)	ELMOD1 - elmo/ced-12 domain containing 1]
GO:0001764	neuron migration	16	NEUROG2 - neurogenin 2	CNTN2 - contactin 2 (axonal)	GPM6A - glycoprotein m6a	FYN - fyn oncogene related to src	fgr	yes	NRCAM - neuronal cell adhesion molecule	FGF13 - fibroblast growth factor 13	SEMA6A - sema domain	transmembrane domain (tm)	and cytoplasmic domain	(semaphorin) 6a	FZD3 - frizzled family receptor 3	MARK1 - map/microtubule affinity-regulating kinase 1	DNER - delta/notch-like egf repeat containing	DCX - doublecortin	NTRK3 - neurotrophic tyrosine kinase	receptor	type 3	CELSR2 - cadherin	egf lag seven-pass g-type receptor 2 (flamingo homolog	drosophila)	CELSR1 - cadherin	egf lag seven-pass g-type receptor 1 (flamingo homolog	drosophila)	DCC - deleted in colorectal carcinoma	DAB1 - disabled homolog 1 (drosophila)]
GO:0031175	neuron projection development	11	FEZF2 - fez family zinc finger 2	LYN - v-yes-1 yamaguchi sarcoma viral related oncogene homolog	PAK3 - p21 protein (cdc42/rac)-activated kinase 3	DAB1 - disabled homolog 1 (drosophila)	GNAO1 - guanine nucleotide binding protein (g protein)	alpha activating activity polypeptide o	ATCAY - ataxia	cerebellar	cayman type	BMP7 - bone morphogenetic protein 7	ATP8A2 - atpase	aminophospholipid transporter	class i	type 8a	member 2	LGI1 - leucine-rich	glioma inactivated 1	MAP1B - microtubule-associated protein 1b	MAP2 - microtubule-associated protein 2]
GO:0051899	membrane depolarization	10	NLGN3 - neuroligin 3	GRIK1 - glutamate receptor	ionotropic	kainate 1	SNCA - synuclein	alpha (non a4 component of amyloid precursor)	NLGN4X - neuroligin 4	x-linked	GRIN2B - glutamate receptor	ionotropic	n-methyl d-aspartate 2b	ANK2 - ankyrin 2	neuronal	SLC17A7 - solute carrier family 17 (sodium-dependent inorganic phosphate cotransporter)	member 7	CACNG4 - calcium channel	voltage-dependent	gamma subunit 4	CACNA1B - calcium channel	voltage-dependent	n type	alpha 1b subunit	CACNA1E - calcium channel	voltage-dependent	r type	alpha 1e subunit]
GO:0050773	regulation of dendrite development	9	NLGN3 - neuroligin 3	PREX1 - phosphatidylinositol-3	4	5-trisphosphate-dependent rac exchange factor 1	NR2E1 - nuclear receptor subfamily 2	group e	member 1	SIPA1L1 - signal-induced proliferation-associated 1 like 1	DCC - deleted in colorectal carcinoma	BMP7 - bone morphogenetic protein 7	NELF - nasal embryonic lhrh factor	CAMK2B - calcium/calmodulin-dependent protein kinase ii beta	LRP8 - low density lipoprotein receptor-related protein 8	apolipoprotein e receptor]
GO:0007270	neuron-neuron synaptic transmission	8	GRIK1 - glutamate receptor	ionotropic	kainate 1	TMOD2 - tropomodulin 2 (neuronal)	GABRG2 - gamma-aminobutyric acid (gaba) a receptor	gamma 2	KIF1B - kinesin family member 1b	SLC17A7 - solute carrier family 17 (sodium-dependent inorganic phosphate cotransporter)	member 7	CAMK4 - calcium/calmodulin-dependent protein kinase iv	SHC3 - shc (src homology 2 domain containing) transforming protein 3	UNC13A - unc-13 homolog a (c. elegans)]
GO:0007416	synapse assembly	8	NLGN3 - neuroligin 3	GPM6A - glycoprotein m6a	LRP4 - low density lipoprotein receptor-related protein 4	NRCAM - neuronal cell adhesion molecule	NLGN4X - neuroligin 4	x-linked	DNM3 - dynamin 3	DNER - delta/notch-like egf repeat containing	PCDHB5 - protocadherin beta 5]
GO:0046847	filopodium assembly	7	SRGAP2 - slit-robo rho gtpase activating protein 2	FGD4 - fyve	rhogef and ph domain containing 4	TTYH1 - tweety homolog 1 (drosophila)	MTSS1 - metastasis suppressor 1	DNM3 - dynamin 3	ARHGAP26 - rho gtpase activating protein 26	SPATA13 - spermatogenesis associated 13]
GO:0048168	regulation of neuronal synaptic plasticity	7	CNTN2 - contactin 2 (axonal)	SNCA - synuclein	alpha (non a4 component of amyloid precursor)	NELF - nasal embryonic lhrh factor	CAMK2B - calcium/calmodulin-dependent protein kinase ii beta	SYP - synaptophysin	S100B - s100 calcium binding protein b	UNC13A - unc-13 homolog a (c. elegans)]
GO:0048266	behavioral response to pain	4	GRIK1 - glutamate receptor	ionotropic	kainate 1	GRIN2B - glutamate receptor	ionotropic	n-methyl d-aspartate 2b	SCN9A - sodium channel	voltage-gated	type ix	alpha subunit	CACNA1E - calcium channel	voltage-dependent	r type	alpha 1e subunit]
GO:2001222	regulation of neuron migration	3	SRGAP2 - slit-robo rho gtpase activating protein 2	SEMA6A - sema domain	transmembrane domain (tm)	and cytoplasmic domain	(semaphorin) 6a	NELF - nasal embryonic lhrh factor]
	Upregulated genes
GO:0007155	cell adhesion	15	POSTN - periostin	osteoblast specific factor	CXCL12 - chemokine (c-x-c motif) ligand 12	ALX1 - alx homeobox 1	COL14A1 - collagen	type xiv	alpha 1	SVEP1 - sushi	von willebrand factor type a	egf and pentraxin domain containing 1	NID2 - nidogen 2 (osteonidogen)	EGFL6 - egf-like-domain	multiple 6	PDGFRA - platelet-derived growth factor receptor	alpha polypeptide	COL3A1 - collagen	type iii	alpha 1	MFAP4 - microfibrillar-associated protein 4	THBS2 - thrombospondin 2	CDH11 - cadherin 11	type 2	ob-cadherin (osteoblast)	ROR2 - receptor tyrosine kinase-like orphan receptor 2	COL12A1 - collagen	type xii	alpha 1	CLDN11 - claudin 11]
GO:0030326	embryonic limb morphogenesis	9	GREM1 - gremlin 1	ALX1 - alx homeobox 1	PRRX1 - paired related homeobox 1	TBX4 - t-box 4	SHOX2 - short stature homeobox 2	TBX5 - t-box 5	OSR2 - odd-skipped related 2 (drosophila)	BMP4 - bone morphogenetic protein 4	TBX3 - t-box 3]
GO:0030334	regulation of cell migration	9	CXCL12 - chemokine (c-x-c motif) ligand 12	TGFBR3 - transforming growth factor	beta receptor iii	GREM1 - gremlin 1	PDGFRA - platelet-derived growth factor receptor	alpha polypeptide	HGF - hepatocyte growth factor (hepapoietin a; scatter factor)	TBX5 - t-box 5	ROR2 - receptor tyrosine kinase-like orphan receptor 2	EDNRA - endothelin receptor type a	BMP4 - bone morphogenetic protein 4]
GO:0035148	tube formation	5	GREM1 - gremlin 1	ALX1 - alx homeobox 1	SIX1 - six homeobox 1	TGM2 - transglutaminase 2 (c polypeptide	protein-glutamine-gamma-glutamyltransferase)	BMP4 - bone morphogenetic protein 4]
GO:0030199	collagen fibril organization	5	GREM1 - gremlin 1	COL14A1 - collagen	type xiv	alpha 1	COL3A1 - collagen	type iii	alpha 1	LUM - lumican	COL12A1 - collagen	type xii	alpha 1]
GO:0048742	regulation of skeletal muscle fiber development	4	SHOX2 - short stature homeobox 2	SIX1 - six homeobox 1	BMP4 - bone morphogenetic protein 4	TBX3 - t-box 3]
GO:0060272	embryonic skeletal joint morphogenesis	3	SHOX2 - short stature homeobox 2	OSR2 - odd-skipped related 2 (drosophila)	BMP4 - bone morphogenetic protein 4]
GO:0005201	extracellular matrix structural constituent	6	COL14A1 - collagen	type xiv	alpha 1	COL3A1 - collagen	type iii	alpha 1	FBN1 - fibrillin 1	LUM - lumican	COL12A1 - collagen	type xii	alpha 1	FBLN1 - fibulin 1]
GO:0005518	collagen binding	5	PCOLCE - procollagen c-endopeptidase enhancer	COL14A1 - collagen	type xiv	alpha 1	DCN - decorin	LUM - lumican	NID2 - nidogen 2 (osteonidogen)]
GO:0005509	calcium ion binding	11	ASPN - asporin	SVEP1 - sushi	von willebrand factor type a	egf and pentraxin domain containing 1	HMCN1 - hemicentin 1	THBS2 - thrombospondin 2	FBN1 - fibrillin 1	CD248 - cd248 molecule	endosialin	CDH11 - cadherin 11	type 2	ob-cadherin (osteoblast)	PLSCR4 - phospholipid scramblase 4	NID2 - nidogen 2 (osteonidogen)	FBLN1 - fibulin 1	EGFL6 - egf-like-domain	multiple 6]
GO:1901681	sulfur compound binding	7	POSTN - periostin	osteoblast specific factor	TGFBR3 - transforming growth factor	beta receptor iii	CFH - complement factor h	PCOLCE - procollagen c-endopeptidase enhancer	HPSE2 - heparanase 2	THBS2 - thrombospondin 2	BMP4 - bone morphogenetic protein 4]
GO:0008201	heparin binding	6	POSTN - periostin	osteoblast specific factor	TGFBR3 - transforming growth factor	beta receptor iii	CFH - complement factor h	PCOLCE - procollagen c-endopeptidase enhancer	THBS2 - thrombospondin 2	BMP4 - bone morphogenetic protein 4]
GO Term	FUNCTION
	Downregulated genes
GO:0005509	calcium ion binding	52	NECAB1 - n-terminal ef-hand calcium binding protein 1	RASGRP1 - ras guanyl releasing protein 1 (calcium and dag-regulated)	FAT3 - fat tumor suppressor homolog 3 (drosophila)	SCGN - secretagogin	ef-hand calcium binding protein	MCTP1 - multiple c2 domains	transmembrane 1	PLCB1 - phospholipase c	beta 1 (phosphoinositide-specific)	RPH3A - rabphilin 3a homolog (mouse)	CASQ1 - calsequestrin 1 (fast-twitch	skeletal muscle)	MASP1 - mannan-binding lectin serine peptidase 1 (c4/c2 activating component of ra-reactive factor)	CDHR1 - cadherin-related family member 1	CALB1 - calbindin 1	28kda	MYO5A - myosin va (heavy chain 12	myoxin)	AIF1L - allograft inflammatory factor 1-like	SMOC1 - sparc related modular calcium binding 1	CDHR3 - cadherin-related family member 3	CRB1 - crumbs homolog 1 (drosophila)	PCLO - piccolo (presynaptic cytomatrix protein)	KCNIP1 - kv channel interacting protein 1	TTYH1 - tweety homolog 1 (drosophila)	MMP15 - matrix metallopeptidase 15 (membrane-inserted)	CALB2 - calbindin 2	CAPS2 - calcyphosine 2	SCUBE1 - signal peptide	cub domain	egf-like 1	LPCAT2 - lysophosphatidylcholine acyltransferase 2	LRP4 - low density lipoprotein receptor-related protein 4	SNCA - synuclein	alpha (non a4 component of amyloid precursor)	LRP2 - low density lipoprotein receptor-related protein 2	SYT1 - synaptotagmin i	DNER - delta/notch-like egf repeat containing	SYT4 - synaptotagmin iv	PPEF1 - protein phosphatase	ef-hand calcium binding domain 1	SYP - synaptophysin	LRP8 - low density lipoprotein receptor-related protein 8	apolipoprotein e receptor	MEGF9 - multiple egf-like-domains 9	CELSR2 - cadherin	egf lag seven-pass g-type receptor 2 (flamingo homolog
GO:0003779	actin binding	26	SNTG1 - syntrophin	gamma 1	FGD4 - fyve	rhogef and ph domain containing 4	TMSB15B - thymosin beta 15b	CAMK2B - calcium/calmodulin-dependent protein kinase ii beta	NEBL - nebulette	FMN2 - formin 2	SYNE2 - spectrin repeat containing	nuclear envelope 2	ADD2 - adducin 2 (beta)	CORO2B - coronin	actin binding protein	2b	SHROOM3 - shroom family member 3	MYO5A - myosin va (heavy chain 12	myoxin)	AIF1L - allograft inflammatory factor 1-like	HIP1 - huntingtin interacting protein 1	MYO5B - myosin vb	FHOD3 - formin homology 2 domain containing 3	MYO16 - myosin xvi	TMOD2 - tropomodulin 2 (neuronal)	PHACTR3 - phosphatase and actin regulator 3	CAP2 - cap	adenylate cyclase-associated protein	2 (yeast)	IQGAP2 - iq motif containing gtpase activating protein 2	SPIRE1 - spire homolog 1 (drosophila)	KLHL4 - kelch-like 4 (drosophila)	DMD - dystrophin	MTSS1 - metastasis suppressor 1	EPB41L3 - erythrocyte membrane protein band 4.1-like 3	MYLK - myosin light chain kinase]
GO:0005096	GTPase activator activity	19	PREX1 - phosphatidylinositol-3	4	5-trisphosphate-dependent rac exchange factor 1	ARAP2 - arfgap with rhogap domain	ankyrin repeat and ph domain 2	RALGAPA2 - ral gtpase activating protein	alpha subunit 2 (catalytic)	ARHGAP11A - rho gtpase activating protein 11a	ARHGEF6 - rac/cdc42 guanine nucleotide exchange factor (gef) 6	PLCB1 - phospholipase c	beta 1 (phosphoinositide-specific)	RGS20 - regulator of g-protein signaling 20	PREX2 - phosphatidylinositol-3	4	5-trisphosphate-dependent rac exchange factor 2	RGS6 - regulator of g-protein signaling 6	SRGAP2 - slit-robo rho gtpase activating protein 2	CHN2 - chimerin (chimaerin) 2	IQGAP2 - iq motif containing gtpase activating protein 2	OCRL - oculocerebrorenal syndrome of lowe	SIPA1L1 - signal-induced proliferation-associated 1 like 1	RGS7 - regulator of g-protein signaling 7	ARHGAP26 - rho gtpase activating protein 26	RP2 - retinitis pigmentosa 2 (x-linked recessive)	ELMOD1 - elmo/ced-12 domain containing 1	DEPDC1B - dep domain containing 1b]
GO:0005516	calmodulin binding	18	ADD2 - adducin 2 (beta)	MYO5A - myosin va (heavy chain 12	myoxin)	MYO5B - myosin vb	CASK - calcium/calmodulin-dependent serine protein kinase (maguk family)	PDE1C - phosphodiesterase 1c	calmodulin-dependent 70kda	MAP6 - microtubule-associated protein 6	SYT1 - synaptotagmin i	PLCB1 - phospholipase c	beta 1 (phosphoinositide-specific)	CAMKV - cam kinase-like vesicle-associated	CAMK2B - calcium/calmodulin-dependent protein kinase ii beta	MAP2 - microtubule-associated protein 2	CAMK4 - calcium/calmodulin-dependent protein kinase iv	GAP43 - growth associated protein 43	IQGAP2 - iq motif containing gtpase activating protein 2	ARPP21 - camp-regulated phosphoprotein	21kda	PDE1A - phosphodiesterase 1a	calmodulin-dependent	MYLK - myosin light chain kinase	ADCY1 - adenylate cyclase 1 (brain)]
GO:0005234	extracellular-glutamate-gated ion channel activity	5	GRIK1 - glutamate receptor	ionotropic	kainate 1	GRIA2 - glutamate receptor	ionotropic	ampa 2	GRIA3 - glutamate receptor	ionotropic	ampa 3	GRIA1 - glutamate receptor	ionotropic	ampa 1	GRIN2B - glutamate receptor	ionotropic	n-methyl d-aspartate 2b]
GO:0004890	GABA-A receptor activity	5	GABRA2 - gamma-aminobutyric acid (gaba) a receptor	alpha 2	GABRA3 - gamma-aminobutyric acid (gaba) a receptor	alpha 3	GABRG2 - gamma-aminobutyric acid (gaba) a receptor	gamma 2	GABRG3 - gamma-aminobutyric acid (gaba) a receptor	gamma 3	GABRB3 - gamma-aminobutyric acid (gaba) a receptor	beta 3]
GO:0030276	clathrin binding	5	HIP1 - huntingtin interacting protein 1	SNAP91 - synaptosomal-associated protein	91kda homolog (mouse)	SYT1 - synaptotagmin i	DNER - delta/notch-like egf repeat containing	SYT4 - synaptotagmin iv]
GO:0004971	alpha-amino-3-hydroxy-5-methyl-4-isoxazole propionate selective glutamate receptor activity	3	GRIA2 - glutamate receptor	ionotropic	ampa 2	GRIA3 - glutamate receptor	ionotropic	ampa 3	GRIA1 - glutamate receptor	ionotropic	ampa 1]
GO:0008503	benzodiazepine receptor activity	3	GABRA2 - gamma-aminobutyric acid (gaba) a receptor	alpha 2	GABRA3 - gamma-aminobutyric acid (gaba) a receptor	alpha 3	GABRG2 - gamma-aminobutyric acid (gaba) a receptor	gamma 2]
GO:0019215	intermediate filament binding	3	NES - nestin	MTM1 - myotubularin 1	SYNM - synemin	intermediate filament protein]
	Upregulated genes
GO:0005201	extracellular matrix structural constituent	6	COL14A1 - collagen	type xiv	alpha 1	COL3A1 - collagen	type iii	alpha 1	FBN1 - fibrillin 1	LUM - lumican	COL12A1 - collagen	type xii	alpha 1	FBLN1 - fibulin 1]
GO:0005518	collagen binding	5	PCOLCE - procollagen c-endopeptidase enhancer	COL14A1 - collagen	type xiv	alpha 1	DCN - decorin	LUM - lumican	NID2 - nidogen 2 (osteonidogen)]
GO:0005509	calcium ion binding	11	ASPN - asporin	SVEP1 - sushi	von willebrand factor type a	egf and pentraxin domain containing 1	HMCN1 - hemicentin 1	THBS2 - thrombospondin 2	FBN1 - fibrillin 1	CD248 - cd248 molecule	endosialin	CDH11 - cadherin 11	type 2	ob-cadherin (osteoblast)	PLSCR4 - phospholipid scramblase 4	NID2 - nidogen 2 (osteonidogen)	FBLN1 - fibulin 1	EGFL6 - egf-like-domain	multiple 6]
GO:1901681	sulfur compound binding	7	POSTN - periostin	osteoblast specific factor	TGFBR3 - transforming growth factor	beta receptor iii	CFH - complement factor h	PCOLCE - procollagen c-endopeptidase enhancer	HPSE2 - heparanase 2	THBS2 - thrombospondin 2	BMP4 - bone morphogenetic protein 4]
GO:0008201	heparin binding	6	POSTN - periostin	osteoblast specific factor	TGFBR3 - transforming growth factor	beta receptor iii	CFH - complement factor h	PCOLCE - procollagen c-endopeptidase enhancer	THBS2 - thrombospondin 2	BMP4 - bone morphogenetic protein 4]
[truncated: 32 more columns]
